# Supplementary material
Source: MDPI journal article supplement (https://www.mdpi.com/1999-4907/13/6/875)
Supplement: s1 [file s1]

## Supplemental Table S1. Species

lists Permanent plot species list

| family            | genus                     | species                  |
|-------------------|---------------------------|--------------------------|
| Araceae           | <i>Anthurium</i>          | <i>sp.</i>               |
| Begoniaceae       | <i>Begonia</i>            | <i>parviflora</i>        |
| Burseraceae       | <i>Dacryodes</i>          | <i>peruviana</i>         |
| Cardiopteridaceae | <i>Citronella</i>         | <i>cf. ilicifolia</i>    |
| Clusiaceae        | <i>Garcinia</i>           | <i>madruno</i>           |
| Cyatheaceae       | <i>Alsophila</i>          | <i>cuspidata</i>         |
| Euphorbiaceae     | <i>Acalypha</i>           | <i>diversifolia</i>      |
| Fabaceae          | <i>Inga</i>               | <i>aff. sapindoides</i>  |
| Fabaceae          | <i>Inga</i>               | <i>sp. 1</i>             |
| Fabaceae          | <i>Inga</i>               | <i>sp. 2</i>             |
| Fabaceae          | <i>Inga</i>               | <i>sp. 3</i>             |
| Gesneriaceae      | <i>Gasteranthus</i>       | <i>corallinus</i>        |
| Heliconiaceae     | <i>Heliconia</i>          | <i>aff. fragilis</i>     |
| Lauraceae         | <i>Caryodaphnopsis</i>    | <i>theobromifolia</i>    |
| Lauraceae         | <i>Nectandra</i>          | <i>lineatifolia</i>      |
| Lauraceae         | <i>Persea</i>             | <i>pseudofasciculata</i> |
| Lauraceae         | <i>Rhodostemonodaphne</i> | <i>cf. cyclops</i>       |
| Malvaceae         | <i>Quararibea</i>         | <i>casasecae</i>         |
| Marattiaceae      | <i>Danea</i>              | <i>erecta</i>            |
| Melastomataceae   | <i>Meriania</i>           | <i>tomentosa</i>         |
| Melastomataceae   | <i>Miconia</i>            | <i>brevithecata</i>      |
| Melastomataceae   | <i>Miconia</i>            | <i>cf. gracilis</i>      |
| Melastomataceae   | <i>Miconia</i>            | <i>floribunda</i>        |
| Melastomataceae   | <i>Ossaea</i>             | <i>micrantha</i>         |
| Moraceae          | <i>Clarisia</i>           | <i>biflora</i>           |
| Moraceae          | <i>Ficus</i>              | <i>cuatrecasiana</i>     |
| Moraceae          | <i>Helicostylis</i>       | <i>tovarensis</i>        |
| Moraceae          | <i>Naucleopsis</i>        | <i>ulei</i>              |
| Myrtaceae         | <i>Myrcia</i>             | <i>fallax</i>            |
| Olaceae           | <i>Heisteria</i>          | <i>concinna</i>          |

|               |                    |                                    |
|---------------|--------------------|------------------------------------|
| Piperaceae    | <i>Piper</i>       | <i>obliquum</i>                    |
| Piperaceae    | <i>Piper</i>       | <i>spoliatum</i>                   |
| Primulaceae   | <i>Geissanthus</i> | <i>cf.<br/>longistamine<br/>us</i> |
| Rubiaceae     | <i>Condaminea</i>  | <i>corymbosa</i>                   |
| Rubiaceae     | <i>Faramea</i>     | <i>aff.<br/>oblongifolia</i>       |
| Rubiaceae     | <i>Palicourea</i>  | <i>demissa</i>                     |
| Rubiaceae     | <i>Pentagonia</i>  | <i>sp.</i>                         |
| Sabiaceae     | <i>Meliosma</i>    | <i>occidentalis</i>                |
| Sapindaceae   | <i>Allophylus</i>  | <i>punctatus</i>                   |
| Sapindaceae   | <i>Allophylus</i>  | <i>sp.</i>                         |
| Solanaceae    | <i>Solanum</i>     | <i>leptodoum</i>                   |
| Tapisciaceae  | <i>Huerteia</i>    | <i>glandulosa</i>                  |
| Thymelaeaceae | <i>Daphnopsis</i>  | <i>grandis</i>                     |

## Rapid survey species list

| family        | genus       | species            |
|---------------|-------------|--------------------|
| Actinidaceae  | Saurauia    | sp.                |
| Actinidaceae  | sp.         |                    |
| Anacardiaceae | Mauria      | cf. heterophylla   |
| Anacardiaceae | Tapirira    | guianensis         |
| Annonaceae    | Guatteria   | cf. megalophylla   |
| Annonaceae    | Guatteria   | megalophylla       |
| Annonaceae    | Guatteria   | sp.                |
| Annonaceae    | Rollinia    | aff. dolichopetala |
| Annonaceae    | Rollinia    | edulis             |
| Annonaceae    | sp.         |                    |
| Aquifoliaceae | Ilex        | cf. yurumanguinis  |
| Aquifoliaceae | Ilex        | laurina            |
| Araliaceae    | Dendropanax | aff. macrophyllum  |
| Araliaceae    | Dendropanax | cf. macrophyllum   |
| Araliaceae    | Oreopanax   | confusus           |
| Araliaceae    | Oreopanax   | ecuadorensis       |
| Arecaceae     | Chamaedorea | pinnatifrons       |
| Arecaceae     | Hyospathe   | elegans            |
| Arecaceae     | Wettinia    | aff. oxycarpa      |
| Arecaceae     | Wettinia    | quinaria           |

|               |               |                  |
|---------------|---------------|------------------|
| Asteraceae    | Criptoniosis  | cf. occidentalis |
| Asteraceae    | Critoniopsis  | occidentalis     |
| Asteraceae    | Piptocoma     | discolor         |
| Asteraceae    | sp.           |                  |
| Asteraceae    | Vernonanthura | patens           |
| Bombacaceae   | Matisia       | aff. bolivarii   |
| Bombacaceae   | Matisia       | castano          |
| Bombacaceae   | Matisia       | sp.              |
| Bombacaceae   | Ochroma       | pyramidale       |
| Bombacaceae   | Pachira       | patinoi          |
| Bombacaceae   | Quararibea    | aff. asterolepis |
| Bombacaceae   | sp.           |                  |
| Boraginaceae  | Cordia        | aff. mexiana     |
| Boraginaceae  | Cordia        | colombiana       |
| Boraginaceae  | Cordia        | mexicana         |
| Boraginaceae  | Cordia        | sp.              |
| Boraginaceae  | Tournefortia  | cf. ramosissima  |
| Brunelliaceae | Brunellia     | acostae          |
| Brunelliaceae | Brunellia     | comocladifolia   |
| Burseraceae   | Dacryodes     | cf. cupularis    |
| Burseraceae   | Dacryodes     | cupularis        |
| Burseraceae   | Protium       | ecuadorensis     |
| Burseraceae   | Protium       | sp.              |
| Burseraceae   | sp.           |                  |

|                  |               |                 |
|------------------|---------------|-----------------|
| Capparaceae      | Capparis      | macrophylla     |
| Capparaceae      | Capparis      | sp.             |
| Cecropiaceae     | Cecropia      | aff. andina     |
| Cecropiaceae     | Cecropia      | aff. reticulata |
| Cecropiaceae     | Cecropia      | andina          |
| Cecropiaceae     | Cecropia      | ficifolia       |
| Cecropiaceae     | Cecropia      | reticulata      |
| Cecropiaceae     | Cecropia      | sp.1            |
| Cecropiaceae     | Cecropia      | sp.2            |
| Cecropiaceae     | Coussapoa     | contorta        |
| Chloranthaceae   | Hedyosmum     | cuatrecazanum   |
| Chrysobalanaceae | Couepia       | sp.             |
| Chrysobalanaceae | Licania       | durifolia       |
| Chrysobalanaceae | Licania       | sp.             |
| Clusiaceae       | Chrysochlamys | aff. dependens  |
| Clusiaceae       | Chrysochlamys | dependens       |
| Clusiaceae       | Chrysochlamys | sp.             |
| Clusiaceae       | Clusia        | aff. dixonii    |
| Clusiaceae       | Clusia        | aff. hydrogera  |
| Clusiaceae       | Clusia        | dixonii         |
| Clusiaceae       | Clusia        | sp.             |
| Clusiaceae       | Clusia        | trochimorfis    |
| Clusiaceae       | Garcinia      | macrophylla     |
| Clusiaceae       | Vismia        | lauriformis     |

|                 |                |                    |
|-----------------|----------------|--------------------|
| Cunoniaceae     | Weinmannia     | balbisiana         |
| Cyatheaceae     | Alsophila      | cuspidata          |
| Cyatheaceae     | Alsophila      | erinacea           |
| Cyatheaceae     | Cyathea        | caracasana         |
| Cyatheaceae     | Cyathea        | halonata           |
| Cyatheaceae     | sp.            |                    |
| Dichapetalaceae | Stephanopodium | angulatum          |
| Dichapetalaceae | Stephanopodium | longipedicellatum  |
| Dicksoniaceae   | Dicksonia      | sellowiana         |
| Elaeocarpaceae  | Sloanea        | cf. grandiflora    |
| Elaeocarpaceae  | Sloanea        | sp. 1              |
| Elaeocarpaceae  | Sloanea        | sp. 2              |
| Ericaceae       | Psammisia      | aberrans           |
| Ericaceae       | Psammisia      | sodiroi            |
| Erythroxylaceae | Erythroxylum   | cf. novogranatense |
| Euphorbiaceae   | Acalypha       | aff. diversifolia  |
| Euphorbiaceae   | Acalypha       | diversifolia       |
| Euphorbiaceae   | Alchornea      | cf. grandis        |
| Euphorbiaceae   | Alchornea      | cf. leptogyna      |
| Euphorbiaceae   | Hieronyma      | alchorneoides      |
| Euphorbiaceae   | Hieronyma      | asperifolia        |
| Euphorbiaceae   | Plukenetia     | volubilis          |
| Euphorbiaceae   | Sapium         | marmieri           |
| Euphorbiaceae   | Sapium         | stylare            |

|                   |               |                   |
|-------------------|---------------|-------------------|
| Euphorbiaceae     | Tetrorchidium | andinum           |
| Euphorbiaceae     | Tetrorchidium | macrophyllum      |
| Fab-Caesalpiaceae | Senna         | dariensis         |
| Fab-Faboideae     | Dussia        | lehmannii         |
| Fab-Faboideae     | Erythrina     | megistophylla     |
| Fab-Faboideae     | Erythrina     | schimpffii        |
| Fab-Faboideae     | Erythrina     | sp.               |
| Fab-Faboideae     | Lonchocarpus  | sp.               |
| Fab-Faboideae     | sp.           |                   |
| Fab-Mimosoideae   | Abarema       | sp.               |
| Fab-Mimosoideae   | Cojoba        | arborea           |
| Fab-Mimosoideae   | Inga          | aff. lallensis    |
| Fab-Mimosoideae   | Inga          | aff. nobilis      |
| Fab-Mimosoideae   | Inga          | aff. sapindoides  |
| Fab-Mimosoideae   | Inga          | aff. villosissima |
| Fab-Mimosoideae   | Inga          | lallensis         |
| Fab-Mimosoideae   | Inga          | oerstediana       |
| Fab-Mimosoideae   | Inga          | punctata          |
| Fab-Mimosoideae   | Inga          | sp.               |
| Fab-Mimosoideae   | Inga          | villosissima      |
| Fab-Mimosoideae   | sp.           |                   |
| Flacourtiaceae    | Banara        | guianensis        |
| Flacourtiaceae    | Banara        | regia             |

|                |          |              |
|----------------|----------|--------------|
| Flacourtiaceae | Banara   | riparia      |
| Flacourtiaceae | Casearia | cajambrensis |
| Flacourtiaceae | Casearia | sylvestris   |
| Flacourtiaceae | sp.      |              |
| Hippocrataceae | Salacia  | cordata      |
| Indeterminado  | sp. 1    |              |
| Indeterminado  | sp. 10   |              |
| Indeterminado  | sp. 11   |              |
| Indeterminado  | sp. 12   |              |
| Indeterminado  | sp. 13   |              |
| Indeterminado  | sp. 14   |              |
| Indeterminado  | sp. 15   |              |
| Indeterminado  | sp. 16   |              |
| Indeterminado  | sp. 17   |              |
| Indeterminado  | sp. 18   |              |
| Indeterminado  | sp. 19   |              |
| Indeterminado  | sp. 2    |              |
| Indeterminado  | sp. 3    |              |
| Indeterminado  | sp. 4    |              |
| Indeterminado  | sp. 5    |              |
| Indeterminado  | sp. 6    |              |
| Indeterminado  | sp. 7    |              |



|               |                 |                    |
|---------------|-----------------|--------------------|
| Indeterminado | sp. 8           |                    |
| Indeterminado | sp. 9           |                    |
| Lauraceae     | Aniba           | aff. hostmanniana  |
| Lauraceae     | Aniba           | cf. hostmanniana   |
| Lauraceae     | Beilschmiedia   | aff. costaricensis |
| Lauraceae     | Beilschmiedia   | alloiophylla       |
| Lauraceae     | Beilschmiedia   | sp.                |
| Lauraceae     | Caryodaphnopsis | theobromifolia     |
| Lauraceae     | Cinnamomum      | triplinerve        |
| Lauraceae     | Endlicheria     | cf. chalisea       |
| Lauraceae     | Endlicheria     | cf. sericea        |
| Lauraceae     | Endlicheria     | cf. tessmannii     |
| Lauraceae     | Endlicheria     | formosa            |
| Lauraceae     | Endlicheria     | klugii             |
| Lauraceae     | Endlicheria     | sp.                |
| Lauraceae     | Licaria         | aff. tomentosa     |
| Lauraceae     | Licaria         | cf. tomentosa      |
| Lauraceae     | Nectandra       | acutifolia         |
| Lauraceae     | Nectandra       | aff. guararipo     |
| Lauraceae     | Nectandra       | aff. laurel        |
| Lauraceae     | Nectandra       | aff. membranacea   |
| Lauraceae     | Nectandra       | aff. parviflora    |
| Lauraceae     | Nectandra       | aff. Purpurea      |
| Lauraceae     | Nectandra       | guadaripo          |

|           |           |                        |
|-----------|-----------|------------------------|
| Lauraceae | Nectandra | membranacea            |
| Lauraceae | Nectandra | obtusata               |
| Lauraceae | Nectandra | sp. 1                  |
| Lauraceae | Nectandra | sp. 2                  |
| Lauraceae | Nectandra | sp. 3                  |
| Lauraceae | Nectandra | sp.1                   |
| Lauraceae | Ocotea    | aff. cernua            |
| Lauraceae | Ocotea    | aff. floccifera        |
| Lauraceae | Ocotea    | aff. heterochroma      |
| Lauraceae | Ocotea    | aff. insularis         |
| Lauraceae | Ocotea    | aff. oblonga           |
| Lauraceae | Ocotea    | cernua                 |
| Lauraceae | Ocotea    | floccifera             |
| Lauraceae | Ocotea    | insularis              |
| Lauraceae | Ocotea    | macrophylla            |
| Lauraceae | Ocotea    | oblonga                |
| Lauraceae | Ocotea    | sp. 1                  |
| Lauraceae | Ocotea    | sp. 2                  |
| Lauraceae | Ocotea    | stenoneura             |
| Lauraceae | Persea    | aff. areolatocostae    |
| Lauraceae | Persea    | aff. pseudofasciculata |
| Lauraceae | Persea    | povedae                |
| Lauraceae | Persea    | pseudofasciculata      |
| Lauraceae | Persea    | rigens                 |

|                 |                    |                    |
|-----------------|--------------------|--------------------|
| Lauraceae       | Pleurothyrium      | aff. giganthum     |
| Lauraceae       | Pleurothyrium      | cinereum           |
| Lauraceae       | Pleurothyrium      | giganthum          |
| Lauraceae       | Pleurothyrium      | glabritepalum      |
| Lauraceae       | Pleurothyrium      | sp.                |
| Lauraceae       | Rhodostemonodaphne | aff. cyclops       |
| Lauraceae       | Rhodostemonodaphne | cyclops            |
| Lauraceae       | sp. 1              |                    |
| Lauraceae       | sp. 2              |                    |
| Lauraceae       | sp. 3              |                    |
| Lauraceae       | sp. 4              |                    |
| Lecythidaceae   | Eschweilera        | caudiculata        |
| Lecythidaceae   | Eschweilera        | integrifolia       |
| Lecythidaceae   | Eschweilera        | rimbachii          |
| Lecythidaceae   | Gustavia           | dodsonii           |
| Magnoliaceae    | Talauma            | cf. gilbertoi      |
| Malpighiaceae   | sp.                |                    |
| Malvaceae       | Wercklea           | ferox              |
| Malvaceae       | Wercklea           | sp.                |
| Melastomataceae | Conostegia         | aff. centronioides |
| Melastomataceae | Conostegia         | cuatrecasii        |
| Melastomataceae | Conostegia         | superba            |
| Melastomataceae | Leandra            | subseriata         |

|                 |          |                  |
|-----------------|----------|------------------|
| Melastomataceae | Meriania | finicola         |
| Melastomataceae | Meriania | maxima           |
| Melastomataceae | Meriania | tomentosa        |
| Melastomataceae | Miconia  | aff. brevitheca  |
| Melastomataceae | Miconia  | aggregata        |
| Melastomataceae | Miconia  | cf. subnodosa    |
| Melastomataceae | Miconia  | dapsiliflora     |
| Melastomataceae | Miconia  | loveyoides       |
| Melastomataceae | Miconia  | sp.              |
| Melastomataceae | Ossaea   | cf. micrantha    |
| Melastomataceae | Ossaea   | micrantha        |
| Melastomataceae | Ossaea   | robusta          |
| Melastomataceae | sp. 1    |                  |
| Melastomataceae | sp. 3    |                  |
| Melastomataceae | sp.1     |                  |
| Melastomataceae | sp.2     |                  |
| Melastomataceae | sp.3     |                  |
| Melastomataceae | Topobea  | dodsonorum       |
| Meliaceae       | Guarea   | aff. macrophylla |
| Meliaceae       | Guarea   | cartaguenya      |
| Meliaceae       | Guarea   | cf. pubescens    |
| Meliaceae       | Guarea   | cf. subandina    |
| Meliaceae       | Guarea   | kunthiana        |
| Meliaceae       | Ruagea   | aff. glabra      |

|             |            |                      |
|-------------|------------|----------------------|
| Meliaceae   | Ruagea     | cf. glabra           |
| Meliaceae   | Ruagea     | cf. pubescens        |
| Meliaceae   | Ruagea     | glabra               |
| Meliaceae   | Ruagea     | pubescens            |
| Meliaceae   | Ruagea     | trisperma            |
| Meliaceae   | sp. 1      |                      |
| Meliaceae   | sp.1       |                      |
| Meliaceae   | sp.2       |                      |
| Meliaceae   | Trichilia  | aff. septentrionalis |
| Meliaceae   | Trichilia  | septentrionalis      |
| Meliaceae   | Trichilia  | sp.                  |
| Meliaceae   | Trichilia  | sp. 1                |
| Monimiaceae | Mollinedia | sp.                  |
| Moraceae    | Clarisia   | biflora              |
| Moraceae    | Ficus      | andicola             |
| Moraceae    | Ficus      | caldasiana           |
| Moraceae    | Ficus      | cf. caldasiana       |
| Moraceae    | Ficus      | cotopaxiensis        |
| Moraceae    | Ficus      | cuatrecasana         |
| Moraceae    | Ficus      | dulciaria            |
| Moraceae    | Ficus      | macbridei            |
| Moraceae    | Ficus      | maxima               |
| Moraceae    | Ficus      | mutisii              |
| Moraceae    | Ficus      | sibundoya            |

|               |              |                     |
|---------------|--------------|---------------------|
| Moraceae      | Ficus        | sp.                 |
| Moraceae      | Ficus        | subandina           |
| Moraceae      | Ficus        | tonduzii            |
| Moraceae      | Ficus        | trianae             |
| Moraceae      | Helicostylis | tomentosa           |
| Moraceae      | Helicostylis | tovarensis          |
| Moraceae      | Morus        | insignis            |
| Moraceae      | Naucleopsis  | naga                |
| Moraceae      | Perebea      | aff. xanthochyma    |
| Moraceae      | Pseudolmedia | macrophylla         |
| Moraceae      | Pseudolmedia | rigida              |
| Moraceae      | Sorocea      | jaramilloi          |
| Moraceae      | Sorocea      | steinbachii         |
| Moraceae      | sp.          |                     |
| Moraceae      | sp. 1        |                     |
| Moraceae      | Trophis      | racemosa            |
| Moraceae      | vs. Perebea  | angustifolia        |
| Myristicaceae | Otoba        | gordoniifolia       |
| Myristicaceae | Virola       | aff. sebifera       |
| Myristicaceae | Virola       | sp.                 |
| Myrsinaceae   | Ardisia      | cf. colombiana      |
| Myrsinaceae   | Cybianthus   | humilis             |
| Myrsinaceae   | Geissanthus  | aff. longistamineus |
| Myrsinaceae   | Geissanthus  | aff. pinchinchana   |

|             |               |                     |
|-------------|---------------|---------------------|
| Myrsinaceae | Stylogyne     | ambigua             |
| Myrsinaceae | Weigeltia     | cf. goudotiana      |
| Myrtaceae   | Calyptranthes | sp.                 |
| Myrtaceae   | Eugenia       | cf. florida         |
| Myrtaceae   | Eugenia       | florida             |
| Myrtaceae   | Eugenia       | sp.                 |
| Myrtaceae   | Myrcia        | aff. aliena         |
| Myrtaceae   | Myrcia        | aff. fallax         |
| Myrtaceae   | Myrcia        | cf. aliena          |
| Myrtaceae   | Myrcia        | cf. fallax          |
| Myrtaceae   | Myrcia        | fallax              |
| Myrtaceae   | Myrcia        | splendens           |
| Myrtaceae   | sp.           |                     |
| Ochnaceae   | Ouratea       | aff. weberbaueri    |
| Ochnaceae   | Ouratea       | weberbaueri         |
| Olacaceae   | Heisteria     | sp.                 |
| Piperaceae  | Piper         | aduncum             |
| Piperaceae  | Piper         | aff. nudibracteatum |
| Piperaceae  | Piper         | cf. imperiale       |
| Piperaceae  | Piper         | fuliginosum         |
| Piperaceae  | Piper         | imperiale           |
| Piperaceae  | Piper         | sp.                 |
| Rubiaceae   | Agouticarpa   | grandistipula       |
| Rubiaceae   | Condaminea    | corymbosa           |

|           |            |                 |
|-----------|------------|-----------------|
| Rubiaceae | Elaeagia   | cf. karstenii   |
| Rubiaceae | Elaeagia   | karstenii       |
| Rubiaceae | Elaeagia   | utilis          |
| Rubiaceae | Faramea    | aff. calyptrata |
| Rubiaceae | Faramea    | flavicans       |
| Rubiaceae | Faramea    | fragans         |
| Rubiaceae | Faramea    | glandulosa      |
| Rubiaceae | Faramea    | oblongifolia    |
| Rubiaceae | Faramea    | sp.             |
| Rubiaceae | Guettarda  | crispiflora     |
| Rubiaceae | Guettarda  | hirsuta         |
| Rubiaceae | Hoffmannia | cf. parviflora  |
| Rubiaceae | Isertia    | laevis          |
| Rubiaceae | Isertia    | pittieri        |
| Rubiaceae | Palicourea | acanthacea      |
| Rubiaceae | Palicourea | aff. chignul    |
| Rubiaceae | Palicourea | amethystina     |
| Rubiaceae | Palicourea | cf. stipularis  |
| Rubiaceae | Palicourea | chimboracensis  |
| Rubiaceae | Palicourea | gentryi         |
| Rubiaceae | Palicourea | gibbosa         |
| Rubiaceae | Palicourea | sp.             |
| Rubiaceae | Palicourea | stipularis      |
| Rubiaceae | Palicourea | thyrsiflora     |



|             |               |                     |
|-------------|---------------|---------------------|
| Rubiaceae   | Pentagonia    | macrophylla         |
| Rubiaceae   | Psychotria    | cf. steyermarkii    |
| Rubiaceae   | Psychotria    | flaviflora          |
| Rubiaceae   | Psychotria    | gentryi             |
| Rubiaceae   | Psychotria    | paeonia             |
| Rubiaceae   | Psychotria    | pilosa              |
| Rubiaceae   | Rondeletia    | reflexa             |
| Rubiaceae   | sp. 1         |                     |
| Rubiaceae   | sp.1          |                     |
| Rubiaceae   | sp.2          |                     |
| Rubiaceae   | sp.3          |                     |
| Rubiaceae   | Tocoyena      | pittieri            |
| Rutaceae    | Zanthoxylum   | mauriifolium        |
| Rutaceae    | Zanthoxylum   | sp.                 |
| Sabiaceae   | Meliosma      | aff. occidentalis   |
| Sabiaceae   | Meliosma      | occidentalis        |
| Sapindaceae | Allophyllus   | floribundus         |
| Sapindaceae | Allophyllus   | incanus             |
| Sapindaceae | Allophyllus   | sp.                 |
| Sapindaceae | Cupania       | aff. cinerea        |
| Sapindaceae | Talisia       | aff. nervosa        |
| Sapindaceae | Talisia       | cf. nervosa         |
| Sapotaceae  | Chrysophyllum | aff. venezuelanense |
| Sapotaceae  | Chrysophyllum | cf. argenteum       |

|                 |               |                 |
|-----------------|---------------|-----------------|
| Sapotaceae      | Chrysophyllum | manaosense      |
| Sapotaceae      | Chrysophyllum | sp.             |
| Sapotaceae      | Pouteria      | torta           |
| Simaroubaceae   | Simarouba     | amara           |
| Siparumaceae    | Siparuna      | laurifolia      |
| Siparumaceae    | Siparuna      | salvioides      |
| Siparumaceae    | Siparuna      | sp.             |
| Siparunaceae    | Siparuna      | salvioides      |
| Solanaceae      | Cestrum       | megalophyllum   |
| Solanaceae      | Markea        | pavonii         |
| Solanaceae      | Solanum       | aff. circinatum |
| Solanaceae      | Solanum       | aff. cucullatum |
| Solanaceae      | Solanum       | cf. circinatum  |
| Solanaceae      | Solanum       | cucullatum      |
| Solanaceae      | Solanum       | lepidotum       |
| Solanaceae      | Solanum       | sp.             |
| Staphyleaceae   | Huertia       | glandulosa      |
| Staphyleaceae   | Turpinia      | occidentalis    |
| Styracaceae     | Styrax        | weberbaueri     |
| Symplocaceae    | Symplocos     | fuliginosa      |
| Theaceae        | Freziera      | reticulata      |
| Theophrastaceae | Clavija       | eggersiana      |
| Theophrastaceae | Clavija       | membranacea     |
| Thymelaeaceae   | Schoenobiblus | cf. daphnoides  |

|               |               |                 |
|---------------|---------------|-----------------|
| Thymelaeaceae | Schoenobiblus | daphnoides      |
| Tiliaceae     | sp.           |                 |
| Ulmaceae      | Trema         | micrantha       |
| Urticaceae    | Boehmeria     | caudata         |
| Urticaceae    | Phenax        | aff. rugosus    |
| Urticaceae    | Urera         | aff. caracasana |
| Urticaceae    | Urera         | baccifera       |
| Urticaceae    | Urera         | caracasana      |
| Verbenaceae   | Aegiphila     | alba            |
| Violaceae     | Gloeospermum  | longifolium     |

Supplemental Table S2. Species diversity estimates for historical land-use/habitat types

| Habitat/Land-use | species<br>observed | chao  | chao.se | jack1 | jack1.se | jack2 | boot  | boot.se | n  |
|------------------|---------------------|-------|---------|-------|----------|-------|-------|---------|----|
| BC               | 153                 | 282.7 | 38.5    | 234.6 | 26.1     | 287.5 | 187.9 | 11.6    | 12 |
| BS               | 151                 | 262.5 | 35.3    | 222.5 | 22.3     | 268.6 | 182.0 | 10.0    | 12 |
| CLB              | 146                 | 288.0 | 43.2    | 226.7 | 26.8     | 281.1 | 180.2 | 11.5    | 12 |
| RCA              | 52                  | 103.0 | 25.3    | 78.3  | 15.5     | 92.8  | 63.6  | 6.9     | 4  |
| RG               | 186                 | 302.9 | 33.7    | 271.7 | 22.1     | 324.8 | 223.6 | 10.9    | 21 |
